# Supplementary material for: Agronomic and physiological responses of seed-potato in different organic substrates
Source: Research Square preprint supplement (doi:10.21203/rs.3.rs-7659075/v1), 2025-11-18
Supplement: Supplementary file 1 [file a1e49003fd57c83751fdd2fb.xlsx]

## Sheet: Planilha1
Primeiro experimento aracy trocas gasosas
Substratos	Repetições	A	E	Ci	gsw
1	1	13.4731	3.5745	282.084	0.2306
1	4	11.6672	7.5482	343.452	0.5673
1	5	18.8052	7.34	312.106	0.5299
2	2	19.0261	7.9416	317.688	0.5972
2	3	9.6811	2.7484	294.756	0.1817
2	5	11.5739	2.4843	256.693	0.1526
3	1	17.6904	9.4398	329.112	0.7208
3	2	19.3788	10.528	331.222	0.8526
3	3	7.6273	1.5883	260.366	0.0998
4	2	16.272	5.2387	294.677	0.3378
4	3	4.5966	1.2425	285.322	0.0736
4	5	15.0753	4.3032	291.415	0.2925
5	1	9.6176	2.5235	291.152	0.1722
5	3	7.2137	1.2804	236.657	0.0787
5	4	17.4454	7.8838	320.307	0.5626
6	2	14.2537	3.1651	265.83	0.2084
6	3	12.0547	2.9379	274.547	0.1876
6	5	13.9129	3.4947	279.789	0.2328
7	2	10.4699	2.3909	271.476	0.1551
7	4	13.2648	3.253	277.899	0.2158
7	5	11.5449	3.3311	294.521	0.2217
8	1	18.422	9.0531	328.097	0.7191
8	2	14.7264	3.8777	288.714	0.2738
8	4	18.0746	11.2251	335.393	0.8752
9	2	18.9672	11.3779	335.195	0.9321
9	3	12.0851	3.1662	279.519	0.1984
9	5	16.2053	10.3967	336.853	0.7732
10	1	12.4374	3.2661	289.618	0.2271
10	3	12.1665	2.5973	257.702	0.1626
10	5	18.0657	7.3924	316.932	0.547
11	2	13.6721	3.2414	275.836	0.2186
11	3	7.8418	1.4782	240.162	0.0882
11	4	15.6708	5.9297	311.695	0.4123
12	1	13.8582	4.164	298.07	0.2873
12	3	11.7419	2.6478	270.215	0.1741
12	4	18.728	6.6988	307.243	0.4828
13	2	16.1196	6.1231	312.852	0.435
13	3	17.5837	5.6115	298.745	0.3906
13	4	14.2692	5.6115	316.802	0.3977
14	2	9.5503	2.0498	254.858	0.122
14	4	14.979	4.3876	283.272	0.2668
14	5	17.2433	8.2323	324.257	0.6011
15	1	10.7436	3.3959	300.452	0.2205
15	2	15.1399	5.6254	309.698	0.3822
15	3	12.9151	2.9329	268.363	0.1908
16	2	18.7614	7.7707	319.221	0.6001
16	3	12.8996	3.0547	269.427	0.193
16	4	18.4883	10.9519	334.742	0.8796

## Sheet: Planilha2
segundo experimento aracy trocas gasosas
Substrato	A	E	Ci	gsw	EIUA	EIC
S8	4.46995	1.30837	269.225	0.0626312	3.41642	0.0166031
S8	6.94494	2.15239	290.57	0.121714	3.22663	0.0239011
S8	5.01419	0.819058	181.248	0.0394743	6.12189	0.0276649
S2	5.44441	1.47642	265.396	0.0740979	3.68758	0.0205143
S2	1.05799	0.219846	210.555	0.00956211	4.8124	0.00502475
S2	1.52296	0.26232	137.422	0.00977451	5.80574	0.0110823
S9	1.82377	0.300668	171.996	0.0135263	6.06575	0.0106036
S9	2.11026	0.533752	243.02	0.0236292	3.95364	0.00868349
S11	3.47775	0.823963	240.344	0.0384831	4.22076	0.0144699
S11	1.30443	0.274577	211.045	0.0118476	4.7507	0.00618084			médias EiC
S10	5.23414	1.05352	218.072	0.0506669	4.96826	0.0240019		Comercial	0.0269077
S10	4.05396	1.14853	261.058	0.0528675	3.52969	0.015529		S8	0.022723
S10	1.24382	0.307008	225.874	0.0124172	4.05144	0.00550673		S15	0.0221951
S1	6.31316	2.1443	290.386	0.110679	2.94415	0.0217406		S1	0.0207214
S1	5.1421	1.14667	234.4	0.0551882	4.48438	0.0219373		S3	0.0172262
S1	3.10298	0.62979	167.853	0.0229717	4.92701	0.0184863		S10	0.0150125
S3	3.75856	0.855037	230.205	0.0389883	4.39579	0.016327		S2	0.0122071
S3	4.81076	1.16504	259.661	0.06174	4.12928	0.0185271		S11	0.0103254
S3	4.16586	1.03774	247.606	0.0488483	4.01436	0.0168245		S9	0.00964353
S15	3.20432	0.580688	175.98	0.0244897	5.51815	0.0182085
S15	3.49744	0.648105	178.119	0.0270609	5.3964	0.0196354
S15	3.45532	0.456674	120.221	0.0207294	7.56628	0.0287414
Comercial	8.14555	1.88925	242.977	0.0949481	4.31152	0.0335239
Comercial	4.02824	0.689766	178.112	0.0311263	5.84001	0.0226164
Comercial	4.3387	0.936344	176.493	0.0337431	4.63366	0.0245829

## Sheet: Planilha3
terceiro experimento ágata trocas gasosas
Substratos	A	E	Ci	gsw	EIUA	EIC
10	0.710258	0.438692	318.123	0.0171559	1.61904	0.00223265
10	3.94769	0.937473	222.175	0.0391633	4.21099	0.0177683
11	3.71796	2.2454	342.733	0.139253	1.65581	0.010848
11	1.33949	0.280266	174.859	0.0101606	4.77936	0.00766042
11	2.0388	0.564041	251.291	0.0243045	3.61462	0.00811329
12	3	2.26741	321.666	0.115227	1.94841	0.0137343
12	4.28016	1.18652	265.577	0.057828	3.60733	0.0161165
12	3.56192	1.18303	263.616	0.0479122	3.01085	0.0135118
13	3.7081	1.30528	284.056	0.0596597	2.84085	0.0130541
13	4.64724	1.79064	295.526	0.085396	2.59529	0.0157253
13	3.00602	1.18568	290.859	0.0518375	2.53527	0.010335
14	3.7081	1.30528	284.056	0.0596597	2.84085	0.0130541
14	4.64724	1.79064	295.526	0.085396	2.59529	0.0157253
14	3.00602	1.18568	290.859	0.0518375	2.53527	0.010335
15	3.02491	1.55236	320.498	0.0758444	1.94859	0.00943813
15	4.43646	1.09481	249.991	0.0529452	4.05227	0.0177465
15	3.66188	0.845447	202.139	0.0323707	4.33129	0.0181156
16	4.37099	2.32247	327.272	0.124428	1.88204	0.0133558
16	5.41586	1.47379	239.084	0.0609392	3.67478	0.0226526
16	5.94303	1.27798	231.12	0.0626872	4.65032	0.0257141
18	4.47139	1.59445	298.992	0.0842702	2.80435	0.0149549
18	2.41417	0.585083	219.187	0.0233296	4.1262	0.0110142
18	2.01312	0.431869	209.834	0.0182701	4.66143	0.00959387

## Sheet: Planilha4
aracy ruiva quarto experimento trocas gasosas
Substratos	A	E	Ci	gsw	EIUA	EIC	EIUA	EIC
S8	4.68807	1.56058	269.446	0.0667309	3.00406	0.0173989	3.00406	0.0173989
S8	4.38733	1.13916	225.999	0.0449525	3.85137	0.019413	3.85137	0.019413		Variável Ci			Variável EIUA
S8	0.615658	0.222865	252.131	0.0074858	2.76247	0.00244181	2.76247	0.00244181		Substratos	Médias Ci		Substratos	Médias EIC
S2	4.25698	1.20523	231.464	0.0453779	3.5321	0.0183915	3.5321	0.0183915		S15	290.19		S3	6.48
S2	5.44102	1.38144	242.674	0.0623872	3.93865	0.0224211	3.93865	0.0224211		S8	249.19		S1	5.23
S2	5.4742	1.47558	238.764	0.061482	3.70988	0.0229272	3.70988	0.0229272		Comercial	239.26		S9	5.21
S2	1.97129	0.291191	119.843	0.0117844	6.76976	0.016449	6.76976	0.016449		S2	237.63		S10	4.92
S2	4.88209	1.08375	220.471	0.0480319	4.5048	0.022144	4.5048	0.022144		S11	207.19		S11	4.46
S2	3.68804	0.846507	193.432	0.0311545	4.35677	0.0190663	4.35677	0.0190663		S10	185.52		S2	3.72
S11	5.3292	1.10456	209.634	0.0492031	4.82473	0.0254214	4.82473	0.0254214		S9	177.91		Comercial	3.56
S11	5.75465	1.52627	253.638	0.071677	3.77041	0.0226885	3.77041	0.0226885		S1	166.19		S8	3.2
S11	3.98104	0.831951	158.324	0.0284271	4.78519	0.0251448	4.78519	0.0251448		S3	139.06		S15	2.88
S10	4.4274	0.876398	180.242	0.0348962	5.05181	0.0245637	5.05181	0.0245637
S10	4.00275	0.765856	193.628	0.0335333	5.22651	0.0206723	5.22651	0.0206723
S10	3.84908	0.858849	182.698	0.0308131	4.48168	0.0210679	4.48168	0.0210679
S1	3.69925	0.680579	162.333	0.0266666	5.43544	0.0227881	5.43544	0.0227881
S1	3.74115	0.735738	148.145	0.0254882	5.0849	0.0252533	5.0849	0.0252533
S1	2.94047	0.565743	188.112	0.0238377	5.19753	0.0156315	5.19753	0.0156315
S3	4.19197	0.618743	138.324	0.0271396	6.77498	0.0303054	6.77498	0.0303054
S3	2.93695	0.474759	139.807	0.0190895	6.1862	0.0210072	6.1862	0.0210072
S15	5.3938	1.58537	277.076	0.0814903	3.40223	0.0194669	3.40223	0.0194669
S15	5.12628	2.16454	303.316	0.104283	2.3683	0.0169008	2.3683	0.0169008
Comercial	3.13134	0.758227	208.84	0.028694	4.12983	0.014994	4.12983	0.014994
Comercial	6.83383	2.27342	269.691	0.0995459	3.00597	0.0253394	3.00597	0.0253394

## Sheet: Planilha5
area foliar experimento 1 aracy ruiva
Substratos	21	24	27	30	33	36	39
S1	12.4546	16.2598	22.6934	25.4444	26.6	27.8667	28.8222
S2	9.48997	11.2168	12.1111	12.7222	14.9009	17.3193	17.5333
S3	6.37249	9.06208	12.5769	14.9778	16.7556	17.7222	20.0556
S4	4.23305	4.81375	5.85291	8.17778	8.55556	8.51	9.95556
S5	4.30946	4.6915	6.26552	8.91111	9.66667	10.3333	10.6667
S6	5.59312	5.82235	6.66285	8.22222	8.64444	9.35556	9.66667
S7	3.49952	3.62178	4.43706	5.67333	6.77556	6.95556	7.48889
S8	13.2493	22.4489	30.3496	40.4444	41.0667	45.2222	53.8222
S9	12.9436	16.0611	18.3294	21.3075	22.4222	23.9778	24.9556
S10	7.87011	8.57307	10.5597	12.5333	13.2222	14.0667	14.3778
S11	8.2063	9.10793	12.5769	16.2889	16.6667	18.4222	19
S12	4.27889	5.01242	6.9532	10.2667	11.4889	12.8667	13.5556
S13	3.05635	3.19389	4.24833	5.8	6.37778	7.06667	7.15556
S14	5.21108	6.2808	7.38109	9.84444	10.3778	11.4889	12.1556
S15	10.5597	13.1313	15.3887	18.1835	20.5111	21.4444	22.1778
S16	3.98854	5.14995	6.32665	9.06667	10.3333	11.6	11.8889

## Sheet: Planilha6
área foliar segundo experimento
Substratos	área foliar
			dias após o plantio
	21	24	27	30	33	36	39
S1	3.33838	5.38234	7.15414	7.56751	9.26036	9.95293	12.038
S2	4.02985	5.84825	6.39219	7.64351	8.09343	8.5711	9.5255
S3	2.03731	2.97727	7.40354	8.55936	10.6182	11.3531	14.9857
S8	3.67189	4.63195	4.79545	4.91234	36.6061	41.9724	44.1997
S9	4.07463	5.97556	6.34091	6.79106	7.28273	7.52101	8.09502
S10	5.37313	6.06891	6.82881	6.93647	7.60354	8.4614	11.5402
S11	3.70704	6.49021	11.8969	13.5267	14.4189	14.5719	15.2939
S15	3.33838	5.38234	7.15414	7.56751	9.26036	9.95293	12.038
Comercial	11.597	14.6364	17.4318	17.6319	33.2401	35.6963	38.4666

## Sheet: Planilha7
área foliar terceiro ágata
Substratos	área foliar
			dias após o plantio
	21	24	27	30	33	36	39
S1	5.30597	6.81818	21.1364	27.2941	28.4222	28.4117	29.7462
S2	5.68657	7.52273	21.9318	25.7955	28.2	30.0842	30.1055
S3	2.84328	3.75	12.8722	14.8262	16.9518	19.7227	20.0806
S8	4.56242	4.88874	6.20455	7.96041	8.16246	8.97398	9.66064
S9	11.9942	15	24.4201	29.7113	31.7558	34.3799	36.6529
S10	4.38806	9.59091	16.2697	23.6601	28.3111	28.3922	29.1505
S11	9.9403	12.5455	26.4545	30.3641	33.9778	52.044	52.1935
S15	8.98507	10.3877	12.2678	12.6768	12.9477	13.4405	17.7532
Comercial	16.1418	24.761	27.1591	36.5764	41.7709	48.42	50.0411

## Sheet: Planilha8
área foliar quarto aracy ruiva
			área foliar
SUBSTRATO	dias após o plantio
	28	31	33	36	39	41
S1	3.06338	3.92232	3.94973	4.31848	4.64802	5.17179
S2	6.01358	6.44159	7.2932	8.11494	8.98518	10.1832
S3	6.86615	7.24531	8.024	9.12764	9.81685	12.036
S8	1.47273	2.03289	2.24309	3.20187	3.06831	4.55097
S9	18.5041	19.4944	30.6703	34.7173	37.4096	39.2359
S10	5.42787	5.79531	6.08728	8.00982	8.19034	8.97885
S11	8.49263	9.18707	9.63598	10.6425	11.6577	12.9817
S15	4.52747	4.64789	5.7494	6.49784	6.85714	7.53501
Comercial	10.9548	12.276	12.5092	13.2441	14.6516	16.7766

## Sheet: Planilha9
Primeiro experimento
área abaixo da curva de crescimento
Substratos	curva	curva transformada
S1	278.86	31.3982
S1	271.687	30.9659
S1	286.469	31.8508
S2	213.055	27.1928
S2	122.07	20.097
S2	159.633	23.2692
S3	80.5322	15.9479
S3	318.88	33.7144
S3	106.139	18.6047
S4	62.5596	13.8189
S4	83.0661	16.2281
S4	111.233	19.0935
S5	136.087	21.3313
S5	114.346	19.3866
S5	34.4816	9.7442
S6	106.671	18.6564
S6	66.6724	14.3306
S6	76.3733	15.4784
S7	91.5516	17.1365
S7	29.8201	8.92155
S7	91.5516	17.1365
S8	338.16	34.7782
S8	552.365	45.0049
S8	387.88	37.3894
S9	253.902	29.8686
S9	216.451	27.4245
S9	255.933	29.9958
S10	102.85	18.283
S10	180.199	24.8476
S10	137.033	21.4123
S11	194.688	25.9061
S11	244.442	29.2693
S11	86.9318	16.6474
S12	78.8766	15.7625
S12	153.746	22.7989
S12	100.408	18.0408
S13	70.3683	14.7772
S13	64.6546	14.0816
S13	55.7328	12.9309
S14	105.411	18.534
S14	85.0707	16.4468
S14	131.336	20.9204
S15	224.838	27.9892
S15	192.847	25.7739
S15	212.482	27.1535
S16	118.083	19.7332
S16	134.488	21.1938
S16	49.9211	12.131

## Sheet: Planilha10
Segundo experimento aracy área abaixo da curva de crescimento
substrato	CURVA		Substratos	médias área abaixo da curva
S1	62.483		S8	319.258
S1	98.5847		Comercial	287.337
S1	120.965		S15	256.461
S2	23.8436		S11	140.81
S2	85.214		S3	98.8459
S2	150.899		S1	94.011
S3	149.385		S10	88.7116
S3	49.625		S2	86.6523
S3	97.5276		S9	79.9922
S8	328.053
S8	310.402
S8	319.32
S9	61.4465
S9	54.7501
S9	123.78
S10	34.1402
S10	173.782
S10	58.2123
S11	181.655
S11	100.964
S11	139.811
S15	395.802
S15	161.236
S15	212.346
Comercial	386.383
Comercial	147.574
Comercial	328.053

[truncated: 11 more sheets: Planilha11, Planilha12, Planilha13, Planilha14, Planilha15, Planilha16, Planilha17, Planilha18, Planilha21, Planilha19, Planilha20]
